# Supplementary material for: Multifunctional ferritin cage nanostructures for fluorescence and MR imaging of tumor cells
Source: Royal Society of Chemistry journal article supplement (doi:10.1039/c1nr11132a), 2011-11-14
Supplement: c1nr11132a.pdf [file c1nr11132a.pdf]

Electronic Supplementary Information

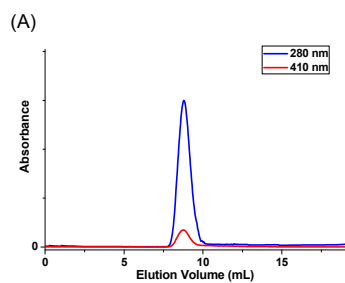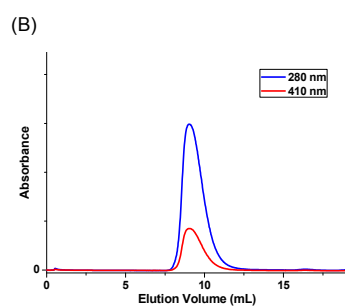

5 Figure S1 The size exclusion chromatograms of RGF (A) and RGF/ Fe<sub>3</sub>O<sub>4</sub> (B).
